# Supplementary material for: Surface Hydrophobization of Block-Shaped Wood with Rapid Benzylation
Source: MDPI journal article supplement (doi:10.3390/f12081028), 2021-08-03
Supplement: s1 [file s1]

# Surface hydrophobization of block-shaped wood with rapid benzylation

Mitsuru Abe\*, Masako Seki, Tsunehisa Miki and Masakazu Nishida

Multi-Materials Research Institute, National Institute of Advanced Industrial Science and Technology (AIST), 2266-98 Shimoshidami, Moriyamaku, Nagoya 463-8560, Japan; m.abe@aist.go.jp

\* Correspondence: m.abe@aist.go.jp; Tel.: +81-52-736-7209

## Contents:

### Experimental section

#### **Dynamic mechanical analysis (DMA)**

### Figures section

**Figure S1.** Photographs of block-shaped wood before and after benzylation.

**Figure S2.** Relative  $E'$  of degreased wood (entry 0) and benzylation wood (entry 6) based on  $E'$  at 40 °C.

**Figure S3.** Water contact angle of heat-treated entry 6 surface for 0 (orange), 1 (green), 5 (red), and 10 min (purple).

**Figure S4.** Photographs of a piece of entry 6 before and after heat treatment.

**Figure S5.** ATR-IR spectra of entry 6 before and after heat treatment.

**Figure S6.** SEM images on various locations in the several samples prepared under the same conditions as entry 6 before and after heat treatment.

## Experimental section

### **Dynamic mechanical analysis (DMA)**

A small test piece ( $2 \times 2 \times 2$  mm) cut from the surface of the wood sample was subjected to DMA (TMA SS6100; Hitachi High-Tech Science Corp., Tokyo, Japan). An oscillating compressive load of  $150 \pm 50$  mN (frequency of 0.03 Hz) in the R direction was applied to the test piece, and dry nitrogen gas was purged during the measurement. The measurement was conducted with increasing temperature from 30 °C to 200 °C at a constant temperature rate of 3 °C/min. The results of the heating process in the second cycle was computed.

## Figures section

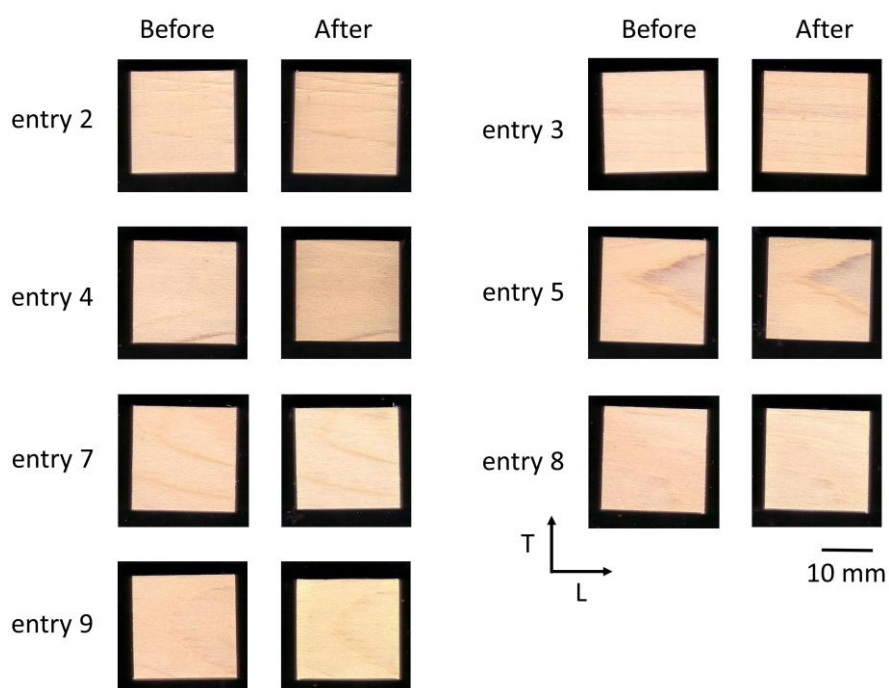

**Figure S1.** Photographs of block-shaped wood before and after benzylation.

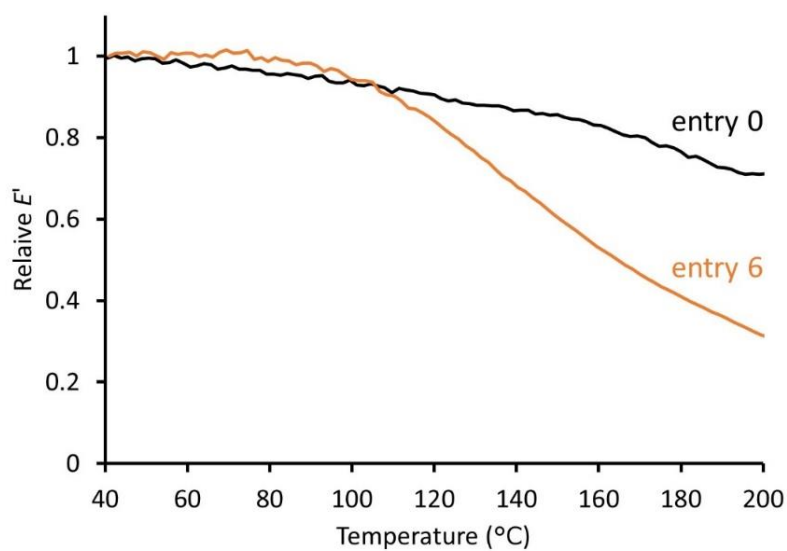

**Figure S2.** Relative  $E'$  of degreased wood (entry 0) and benzylated wood (entry 6) based on  $E'$  at 40 °C.

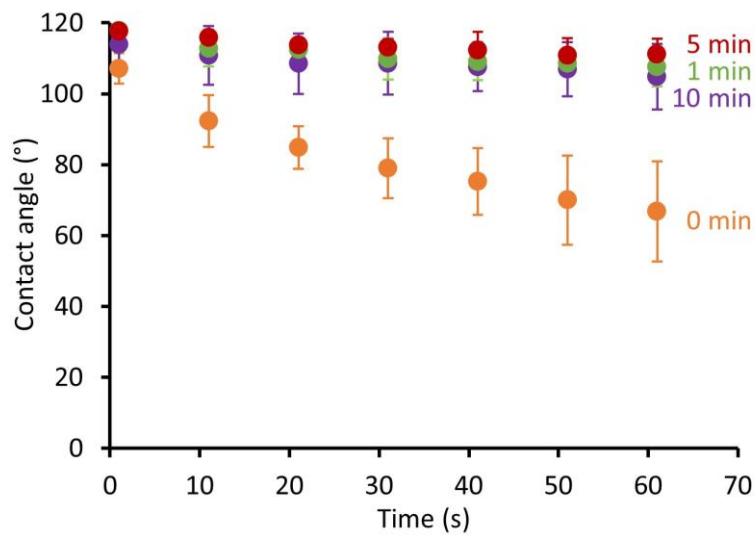

**Figure S3.** Water contact angle of heat-treated entry 6 surface for 0 (orange), 1 (green), 5 (red), and 10 min (purple). Error bar shows the standard deviations based on the values of 3–5 samples.

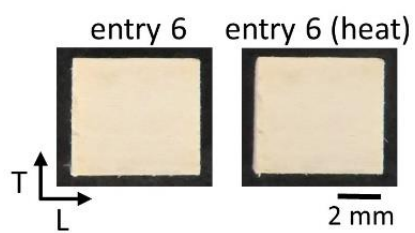

**Figure S4.** Photographs of a piece of entry 6 before and after heat treatment.

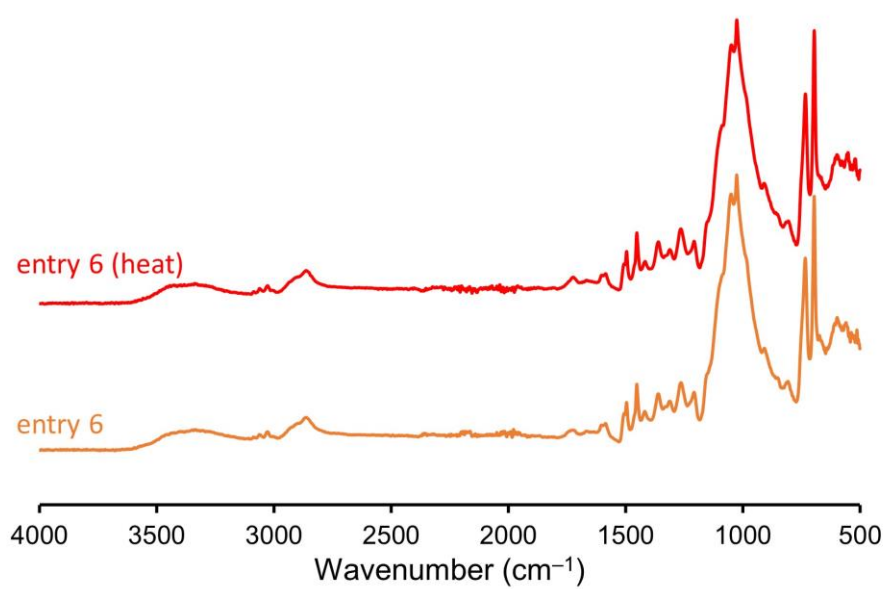

**Figure S5.** ATR-IR spectra of entry 6 before and after heat treatment.

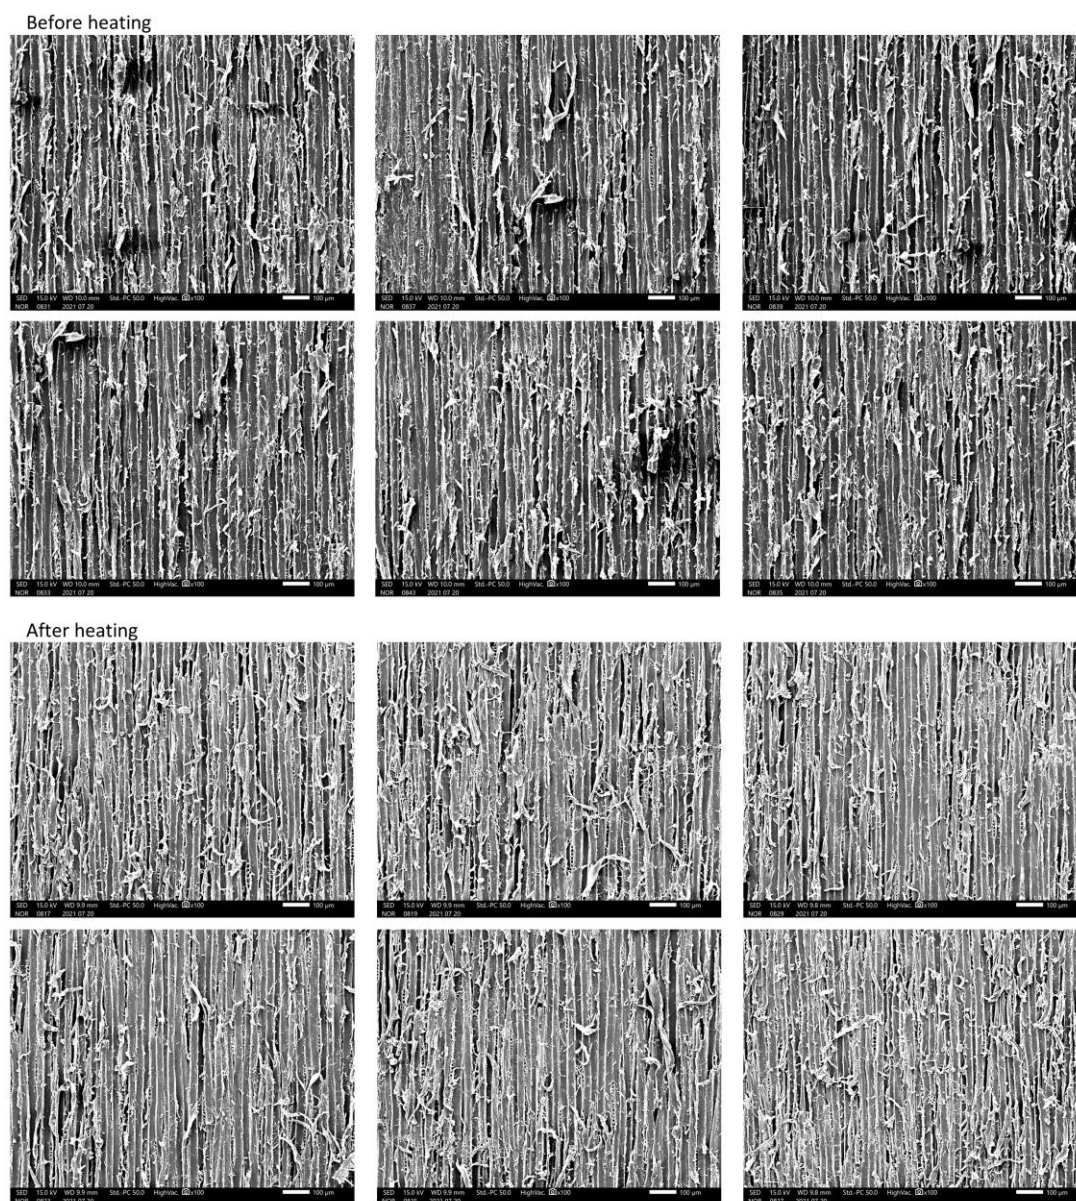

**Figure S6.** SEM images on various locations in the several samples prepared under the same conditions as entry 6 before and after heat treatment.
